# Supplementary material
Source: PubMed Central journal article supplement (PMC2898322)

Figure. S1 (Tang et al.)

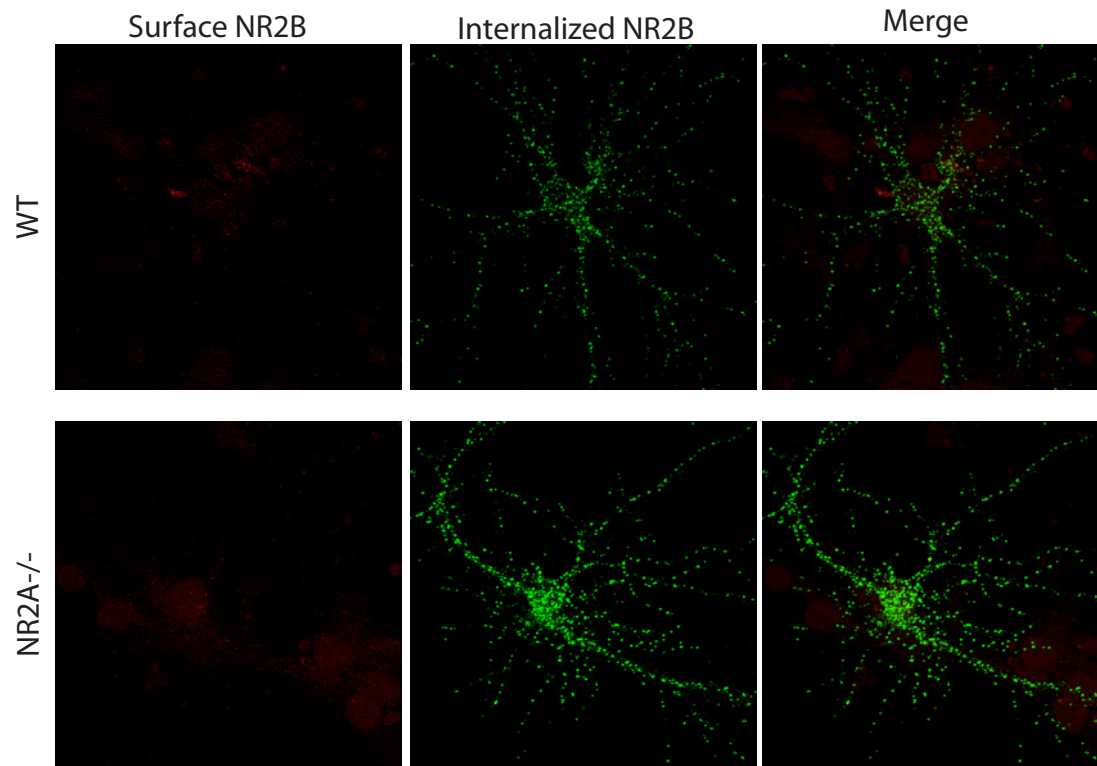

Supplement: supp_M110.102210_jbc.M110.102210-1.pdf [file supp_M110.102210_jbc.M110.102210-1.pdf]
